# Supplementary material
Source: PubMed Central journal article supplement (PMC3862045)
Supplement: 10-1055-s-0033-1350880-sup_gf678.pdf [file 10-1055-s-0033-1350880-sup_gf678.pdf]

# Mammografie-Screening – Stand 2013

## Mammography Screening – as of 2013

### Autoren

S. Heywang-Koebrunner<sup>1</sup>, K. Bock<sup>2</sup>, W. Heindel<sup>3</sup>, G. Hecht<sup>4</sup>, L. Regitz-Jedermann<sup>5</sup>, A. Hacker<sup>6</sup>, V. Kaeab-Sanyal<sup>7</sup>

### Institute

Die Institutsangaben sind am Ende des Beitrags gelistet.

### Schlüsselwörter

- Mamma
- Mammakarzinom
- Mammografie-Screening

### Key words

- mamma
- breast cancer
- mammogram screening

### Zusammenfassung

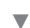

**Einleitung:** Seit 2008 steht das Deutsche Mammografie-Screening-Programm flächendeckend allen Frauen zwischen 50 und 69 Jahren zur Verfügung. Das Programm folgt streng den europäischen Leitlinien. In den Medien wie auch in der Fachpresse gibt es kontroverse Diskussionen.

**Material und Methoden:** Überblick über die Datenlage bez. der Bewertung der randomisierten Screening-Programme gemäß EU-Leitlinien (inklusive Daten aus 18 Screening-Ländern).

**Ergebnisse:** Positive Wirkungen des Screenings: Mortalitätsreduktion, schonendere Behandlung. Negative Wirkungen: Falsch positive Befundungen und Biopsieempfehlungen, sog. Überdiagnosen, Strahlendosis. Grenzen des Screenings: Intervallkarzinome, nicht vollständige Mortalitätsreduktion. Eine rechnerische Synopse der aktuellsten Veröffentlichungen der europäischen Screening-Programme mit den Abklärungsraten in Deutschland ermittelt aus >4,6 Mio. Screening-Untersuchungen ergibt folgendes: Von 1000 Frauen (TN), die am Mammografie-Screening-Programm teilnehmen (jede davon erhält in 20 Jahren 10 Mammografien), werden insgesamt 10000 Mammografien erstellt. Insgesamt liegt das Risiko, durch eine Mammografie Brustkrebs auszulösen, ganz deutlich unter dem jährlichen natürlichen Risiko, an Brustkrebs zu erkranken. Im deutschen Screening werden von diesen 1000 Frauen wegen schlussendlich benigner Veränderungen durchschnittlich 288 Frauen 1-mal in 20 Jahren wiedereinbestellt (< 3% pro Runde). Davon erhalten 74 der 288 Frauen eine Biopsie wegen einer benignen Veränderung (falsch positive Biopsieempfehlungen, i.d.R. Stanz- oder Vakuumbiopsie). Bezogen auf diesen Zeitraum entstehen entsprechend EUROSREEN 71 Karzinome bei den Teilnehmerinnen (56 werden im Screening, 15 im Intervall entdeckt), bei Nichtteilnehmerinnen (56 werden im Screening, 15 im Intervall entdeckt), bei Nichtteilnehmerinnen (56 werden im Screening, 15 im Intervall entdeckt), bei Nichtteilnehmerinnen (56 werden im Screening, 15 im Intervall entdeckt).

### Abstract

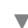

**Introduction:** Since 2008 the German Mammography Screening Programme has been available throughout Germany to all women aged between 50 and 69. The programme strictly follows the European Guidelines. There are controversial discussions in the media as well as in the specialised press.

**Materials and Methods:** Overview of the available data with regard to an evaluation of randomised studies and with regard to quality-assured screening programmes in accordance with EU Guidelines (including data from 18 screening countries).

**Results:** Positive effects of screening: reduction in mortality, less invasive treatment. Negative effects: false-positive diagnoses and biopsy recommendations, so-called overdiagnoses, radiation dose. Limits of screening: interval carcinomas, incomplete reduction in mortality. A mathematical synopsis of the latest publications from the European screening programmes with the diagnosis rates in Germany determined from >4.6 million screening examinations produces the following: a total of 10000 mammograms are created for 1000 women (P) taking part in the Mammography Screening Programme (each of whom undergoes 10 mammograms in 20 years). Overall, the risk of triggering breast cancer through a mammogram is very clearly below the annual natural risk of suffering from breast cancer. In the German screening, of these 1000 women, an average of 288 women are called back once in 20 years as a result of changes that are ultimately benign (< 3% per cycle). Of these, 74 of the 288 women undergo a biopsy due to a benign change (false-positive biopsy recommendations, usually punch or vacuum biopsies). According to EUROSREEN, 71 carcinomas develop among participants (56 are discovered in the screening, 15 in the interval), and 67 carcinomas among non-participants (N-P) (in

**eingereicht** 16. 5. 2013  
**revidiert** 10. 7. 2013  
**akzeptiert** 9. 8. 2013

### Bibliografie

**DOI** <http://dx.doi.org/10.1055/s-0033-1350880>  
 Geburtsh Frauenheilk 2013; 73: 1–10 © Georg Thieme  
 Verlag KG Stuttgart · New York ·  
 ISSN 0016-5751

### Korrespondenzadresse

**Prof. Sylvia Heywang-Koebrunner**  
 Referenzzentrum Mammografie  
 München  
 Sonnenstraße 29  
 80331 München  
 sylvia.heywang@referenzzentrum-muenchen.de

merinnen (N-TN) 67 Karzinome (z. T. mehrere Jahre später). Die 4 zusätzlichen Diagnosen bei den TN werden als Überdiagnosen bezeichnet, da sie nicht zur Mortalitätsreduktion beitragen (diese Teilnehmerinnen versterben vorher an anderen Todesursachen). Bezogen auf die Karzinome, welche die Screening-Periode betreffen, sterben bei den TN 11 Frauen von 1000, bei den Nicht-TN sind es 19 Todesfälle (innerhalb des Betrachtungszeitraums plus Nachbeobachtungszeit).

**Diskussion:** Die Falsch-positiv-Rate ist unvermeidbar, ist aber mit Mammografie-Screening weitaus geringer als mit anderen Methoden. Überdiagnosen sind bei jeglicher Früherkennung zu erwarten. Alle Berechnungen erfordern Annahmen und sind daher höchst diskrepant. Sie haben sehr niedrigen Evidenzlevel. Die Strahlendosis sollte bei korrekter Anwendung wegen des sehr geringen Risikos bei deutlichem Benefit kein Grund gegen Screening sein. Intervallkarzinome zeigen die Grenzen eines Mammografie-Screening-Programms auf. Falsch negative stellen nur eine Teilmenge der Intervallkarzinome dar und sind nicht mit ihnen gleichzusetzen. Für eine signifikante Mortalitätsreduktion durch Mammografie-Screening besteht ein sehr hoher Evidenzlevel. Erstmalig hat eine unabhängige Expertenkommission die Ergebnisse der randomisierten Studien und das Statement der WHO von 2002 und deren weitere Gültigkeit bestätigt. Teilnehmerinnen können eine Mortalitätsreduktion um 30% erwarten. Daten aus den aktuellen europäischen Screening-Programmen belegen eine Mortalitätsreduktion von 43%, entsprechend 8/19 geretteten Leben bei 71 Frauen mit Mammakarzinomen bzw. 1000 asymptomatischen TN. Viele weitere TN profitieren aufgrund der Früherkennung von einer schonenderen Behandlung.

**Schlussfolgerung:** Aufgrund der Nutzen-Risiko-Relation ist Mammografie-Screening für asymptomatische Frauen zwischen 50–69 Jahren unbedingt zu empfehlen. Einer Aufklärung der Frauen über die für sie im Gesundheitssystem geschaffenen Möglichkeiten für qualitätsgesicherte Früherkennung durch die betreuenden Frauenärzte kommt hier eine hohe Bedeutung zu.

## Einleitung

Seitdem vor ca. 30 Jahren durch die randomisierten Studien die Effektivität von Mammografie-Screening bez. Mortalitätsreduktion belegt werden konnte, wurde die Mammografie als Früherkennungsmethode in zahlreichen Ländern eingeführt. Qualitätsgesicherte zentral organisierte Mammografie-Screening-Programme wurden insbesondere in Europa, Australien und Neuseeland eingeführt. Diese organisierten Screening-Programme folgen einer definierten Qualitätskontrolle, die – entsprechend EU-Leitlinien – alle Teile des Screenings, beginnend mit der Einladung und der Erstellung der Mammografien bis hin zur Sicherung eines benignen oder malignen Befunds umfassen soll [1]: zentralisierte Qualitätssicherung der gesamten Mammografie-technik mit arbeitstäglich, monatlicher und jährlicher kontinuierlicher externer Überwachung der Geräte- und Aufnahmetechnik, Mindestanforderungen für alle im Screening tätigen ärztlichen und nicht ärztlichen Mitarbeiter bez. Ausbildung und Aufrechterhaltung der fachlichen Befähigung, systematische Befundung aller Aufnahmen durch 2 unabhängige Befunder, Konsensbefundung aller Auffälligkeiten, regelmäßige Teilnahme an interdisziplinären Konferenzen, standardisierte Abklärungskette, systematische Dokumentation und regelmäßige externe Über-

prüfung von Prozess- und Ergebnisqualität anhand von Leistungsparametern.

Im Gegensatz hierzu wird in anderen Ländern wie z. B. den USA sowie bislang Österreich und der Schweiz lediglich ein sog. „graues“ (opportunistisches) Screening durchgeführt. Neben den deutlich geringeren Qualitätsanforderungen erfolgt keine systematische Dokumentation.

In Deutschland wurde ein streng nach EU-Leitlinien arbeitendes Mammografie-Screening-Programm zwischen 2005 und 2009 (Zeitraum bis zur vollständigen Flächendeckung) aufgebaut. Anhand der umfassenden Dokumentation können bereits heute wichtige Qualitätsparameter aus dem deutschen Programm bestimmt und bewertet werden. Sie erlauben erste Einschätzungen zur Effektivität. Genauere Berechnungen zur Mortalitätsreduktion hingegen sind naturgemäß erst ab 8–10 Jahren nach Etablierung eines Screening-Programms möglich.

Die Effektivität des organisierten Mammografie-Screenings ist heute einerseits durch die Ergebnisse der randomisierten Studien [2], andererseits durch epidemiologische Auswertungen aus 18 Screening-Ländern gut belegt [3].

Trotz der hohen bestehenden Evidenz wird Mammografie-Screening zwischen Befürwortern und Früherkennungs-Kritikern heftig diskutiert.

**Discussion:** The false-positive rate is unavoidable, but is far lower with mammography screening than with other methods. Overdiagnoses are to be expected with any early detection. All calculations require assumptions and are therefore highly discrepant. They have very low evidence levels. The radiation dose should not be an argument against screening when applied correctly due to the very low risk and significant benefits. Interval carcinomas indicate the limits of a mammography screening programme. False-negatives only represent a subset of the interval carcinomas and are not to be equated with them. There is a very high evidence level for a significant reduction in mortality through mammography screening. For the first time, an independent expert commission has confirmed the results of the randomised studies and the statement of the WHO from 2002 and their further validity. Participants can expect a reduction in mortality of 30%. Data from the current European screening programmes confirm a mortality reduction of 43%, corresponding to 8/19 saved lives among 71 women with breast cancer or 1000 asymptomatic Ps. Many additional Ps benefit from less invasive treatment due to the early detection.

**Conclusions:** As a result of the risk/benefit ratio, mammography screening should absolutely be recommended to asymptomatic women aged between 50–69. High importance is given to the provision of education for women by the treating gynaecologists as regards the opportunities for quality-assured early detection available to them in the healthcare system.

## Material und Methoden

▼ Diese Arbeit soll einen Überblick über die derzeitige Datenlage geben, die Bewertung der randomisierten Studien auch bez. der qualitätsgesicherten Screening-Programme gemäß EU-Leitlinien (inklusive Daten aus 18 Screening-Ländern) darstellen, Möglichkeiten und Grenzen des Mammografie-Screenings erläutern und über die aus Deutschland bereits vorliegenden Ergebnisse berichten. Es handelt sich nicht um einen systematischen Review.

## Ergebnisse

▼ Als wichtigstes Ziel eines Mammografie-Screening-Programms wurde die Mortalitätsreduktion definiert. Neben diesem Haupteffekt gibt es weitere positive Effekte, die sich aus einer früheren Karzinomentdeckung ergeben. Sie betreffen v. a. schonendere Behandlungsmöglichkeiten (mehr Brusterhaltung, Vermeidung von Axilladissektion, Reduktion an Chemotherapien und ein besseres kosmetisches Ergebnis).

Die Tatsache, dass Intervallkarzinome und auch fortgeschrittene Stadien nicht vermeidbar sind, zeigt die Grenzen des Mammografie-Screenings auf.

Potenzielle Nebenwirkungen ergeben sich aus der applizierten geringen Strahlendosis, aus falsch positiven Befundungen und möglichen Überdiagnosen.

## Mortalitätsreduktion

Die Mortalitätsreduktion durch Mammografie-Screening wurde in 8 randomisierten Studien untersucht. Hierbei hatte sich ergeben, dass für eine Frau, die über einen Zeitraum von 20 Jahren alle 2 Jahre teilnimmt, im Durchschnitt eine Mortalitätsreduktion von ca. 30% zu erwarten ist.

Seit dem Jahr 2000 wurden von Goetzsche die Ergebnisse der randomisierten Studien infrage gestellt. Er versuchte, zunächst 6/8 randomisierten Studien aufgrund der dort angewendeten Cluster-Randomisierung (einem gängigen und anerkannten Randomisierungsverfahren) deshalb für ungültig zu erklären, weil bei Cluster-Randomisierung (Einladung/Nichteinladung ganzer Orte/Städte) prinzipiell zwischen Studien- und Kontrollgruppen Altersunterschiede auftreten können [4]. Er schloss deshalb nach eigener formalistischer Definition 6 von 8 randomisierten Studien aus, obwohl gezeigt werden konnte, dass die zwischen den Studien z.T. gegenläufigen durchschnittlichen Altersunterschiede (von jeweils nur wenigen Monaten) keine Auswirkung auf das Gesamtergebnis hatten.

Von den verbliebenen 2 Studien, die Goetzsche bis heute nach eigener Definition als einzig verlässlich wertet, ist die in Canada durchgeführte Studie wegen erheblicher Mängel in der Mammografiequalität und wegen möglicher schwerer Fehler bei der Randomisierung höchst umstritten [5–7]. Bei der in Malmö durchgeführten Studie war der nachweisbare Effekt deshalb verringert, da ein hohes Cross-over (hoher Anteil an Teilnehmerinnen unter den nicht eingeladenen Frauen und umgekehrt) gegeben war.

In weiteren Veröffentlichungen zweifelte Goetzsche [8] die Objektivität der Todesursachenbestimmung bei einem Teil der Studien an. Diese Behauptungen haben sich nach Reevaluation dieser Studien durch eine unabhängige Kommission der WHO nicht bestätigt [9].

Trotz eindeutiger Stellungnahme der WHO 2002 besteht Goetzsche weiterhin auf einer selektiv unterschiedlichen Bewertung der vorliegenden randomisierten Studien und postuliert weiter

eine Mortalitätsreduktion zwischen eingeladenen vs. nicht eingeladenen Frauen von nur 15%.

Im Jahr 2012 wurde in Großbritannien ein unabhängiges Expertenpanel mit der Reevaluation der Mortalitätsreduktion beauftragt [2]. Das unabhängige Panel hat sowohl die Daten der randomisierten Studien als auch die verfügbaren Metaanalysen reevaluiert und Argumente von Screening-Befürwortern und -gegnern berücksichtigt. Es stellt klar, dass – bezogen auf eingeladene vs. nicht eingeladene Frauen – von einer Mortalitätsreduktion von 20% ausgegangen werden kann. Da bei den randomisierten Studien in der gescreenten Gruppe lediglich 70% der eingeladenen Frauen teilnahmen, entspricht eine Mortalitätsreduktion von 20% – bezogen auf eingeladene vs. nicht eingeladene Frauen – in etwa einer Mortalitätsreduktion von > 30% für tatsächliche Teilnehmerinnen [10]. Insgesamt bestätigt die unabhängige britische Expertenkommission damit die Ergebnisse der randomisierten Studien und das Statement der WHO von 2002.

Die britische Expertenkommission bestätigt explizit, dass sie keinen Grund erkennen kann, einige der randomisierten Studien auszuschließen. Sie bezieht auch Stellung, dass Effekte der verbesserten Therapie und Effekte der Diagnostik mit hoher Wahrscheinlichkeit voneinander unabhängig sind, dass also die belegte Mortalitätsreduktion durch Mammografie-Screening zusätzlich zu den inzwischen verfügbaren Verbesserungen der Therapie zu erwarten ist. Es wird auch auf die parallel erfolgte Verbesserung der Mammografiertechnik seit Abschluss der randomisierten Studien (vor 30 Jahren) verwiesen.

Seit Einführung staatlicher Screening-Programme waren naturgemäß keine weiteren randomisierten Studien mehr möglich. Damit sind andere Studientypen erforderlich, um den Effekt bei Teilnehmerinnen vs. Nichtteilnehmerinnen beurteilen zu können. Von Instituten, die in den Screening-Ländern die Screening-Programme überwachen und die primären Daten ausgewertet haben, wird explizit auf die Notwendigkeit einer korrekten statistischen Methodik hingewiesen [11].

Einfache Trendanalysen werden deshalb als ungeeignet angesehen, da die bereits vor Beginn des Screening-Programms aufgetretenen Brustkrebskrankungen und die daraus resultierenden Todesfälle nicht korrekt herausgerechnet werden können. Dieses kann zu deutlichen Unterschätzungen der Mortalitätsreduktion führen. Zudem lassen sich weitere externe Einflüsse nicht ausreichend erkennen oder berücksichtigen.

Geeignet erscheinen [11, 12] inzidenzbasierte Mortalitätsstudien sowie Fallkontrollstudien; allerdings ist sowohl bei den Mortalitätsstudien als auch bei den Fallkontrollstudien eine Unter- und Überschätzung des Effekts möglich. Größte Bedeutung hat eine ausreichende Nachbeobachtungszeit. Da in der Studiengruppe die Brustkrebsentdeckung z.T. um viele Jahre vorgezogen wird, ist für die Berechnung der Mortalitätsreduktion die Erfassung der z.T. deutlich später entdeckten Tumoren in der Kontrollgruppe sowie deren weitere Verlaufsbeobachtung essenziell. Berücksichtigt man, dass Tumoren nach individuell sehr unterschiedlicher Zeitspanne (Beispiel DCIS) symptomatisch werden, dann aber durchaus unterschiedliche Verläufe zeigen können, wird eine Nachbeobachtungszeit von mindestens 10 Jahren als unverzichtbar angesehen.

Bei allen Studientypen sind auch weitere mögliche Einflussfaktoren zu berücksichtigen. Sie betreffen regionale Unterschiede, zeitliche Trends, relevante Altersunterschiede, Einflüsse durch Ernährung und Medikation, die zwischen der Studiengruppe und den jeweils gewählten Kontrollgruppen auftreten können.

**Tab. 1** Wichtigste Ergebnisse: Leistungsparameter hinsichtlich Brustkrebsentdeckung. Leistungsparameter die Brustkrebsentdeckung betreffend: sämtliche Parameter entsprechen den Vorgaben der EU-Guidelines [1, 24].

| Parameter                                                                    | Referenzbereich EU-Leitlinien, 4. Auflage |                             | Ergebnisse Screening Deutschland 2008–2009 |                               |
|------------------------------------------------------------------------------|-------------------------------------------|-----------------------------|--------------------------------------------|-------------------------------|
|                                                                              | Erstuntersuchungen                        | Folgeuntersuchungen         | Erstuntersuchungen                         | Folgeuntersuchungen           |
| 4. Brustkrebsentdeckungsrate (Vielfaches der regionalen Hintergrundinzidenz) | $\geq 3 \times \text{IR}$                 | $\geq 1,5 \times \text{IR}$ | regional schwankend (1,7–4,6)              | regional schwankend (1,4–4,0) |
| 5. Brustkrebsentdeckungsrate (Fälle je 1 000)                                | ca. 7,5/1 000                             | ca. 3,8/1 000               | 8,2‰                                       | 5,6‰                          |
| 6. Anteil In-situ-Karzinome                                                  | 10%<br>> 15%                              | 10%<br>> 15%                | 19,5%                                      | 19,8%                         |
| 7. Anteil invasiver Karzinome $\leq 10$ mm                                   | k. A.<br>$\geq 25\%$                      | 25%<br>$\geq 30\%$          | 30,0%                                      | 34,9%                         |
| 8. Anteil invasiver Karzinome < 15 mm                                        | $\geq 50\%$                               | $\geq 50\%$                 | 51,3%                                      | 57,2%                         |
| 9. Anteil Karzinome ohne Lymphknotenbefall (N-)                              | k. A.<br>> 70%                            | $\geq 75\%$                 | 74,8%                                      | 79,0%                         |
| 10. Anteil Karzinome im UICC-Stadium II+                                     | k. A.<br>< 30%                            | $\leq 25\%$                 | 28,9%                                      | 24,2%                         |

**Tab. 2** Wichtigste Ergebnisse: Leistungsparameter hinsichtlich Abklärung. Sämtliche Leistungsparameter die Abklärung betreffend, erfüllen die Vorgaben der EU-Leitlinien 4. Auflage [1, 24].

| Parameter                                    | Referenzbereich EU-Leitlinien, 4. Auflage |                     | Ergebnisse Screening Deutschland 2008–2009 |                     |
|----------------------------------------------|-------------------------------------------|---------------------|--------------------------------------------|---------------------|
|                                              | Erstuntersuchungen                        | Folgeuntersuchungen | Erstuntersuchungen                         | Folgeuntersuchungen |
| 3. Wiedereinbestellungsrate                  | 5–7%                                      | 3–5%                | 6,1%                                       | 3,0%                |
| 11. Anteil präoperativ gesicherter Karzinome | $\geq 90\%$ (3. Aufl. > 70%)              |                     | 91,7%                                      |                     |
| 12. PPV I                                    | k. A.                                     |                     | 14,8%                                      |                     |
| 13. PPV II                                   | k. A.                                     |                     | 49,4%                                      |                     |

Ein systematischer Review, der Studien aus 18 Screening-Ländern bez. der korrekten statistischen Methodik analysierte und diejenigen Studien einschloss, die die o.g. Anforderungen erfüllten, zeigte anhand der Daten aus 18 Screening-Ländern eine durchschnittliche Mortalitätsreduktion für tatsächliche Teilnehmerinnen von durchschnittlich 43% (38–48%) [13].

Studien, die neuerdings über eine unverständlich geringe Mortalitätsreduktion berichtet hatten [14, 15], wiesen die o.g. Probleme, z. B. fehlende Trennung der vor Screening inzidenten Karzinome sowie in letzterem Fall eine Nachbeobachtungszeit von nur 2 Jahren (!) auf.

Daten zur Mortalitätsreduktion aus dem deutschen Programm sind frühestens 10 Jahre nach flächendeckender Etablierung des bundesweiten Screening-Programms zu erwarten. Die erforderlichen datenschutzrechtlichen Regelungen werden derzeit weiterhin bundesweit hierfür ausgearbeitet.

Die bisher erhältlichen Prozess- und Ergebnisparameter, die Einfluss auf die Mortalität haben (Detektionsrate, Stadienverteilung der entdeckten Karzinome) lassen für Deutschland einen mit anderen Programmen vergleichbaren Effekt erwarten. **Tab. 1** und **2** zeigen die wichtigsten in den Jahren 2008–2009 erzielten Ergebnisse und die Vorgaben nach EU-Leitlinien. **Abb. 1** gibt einen Überblick über die Stadienverteilung der im Screening-Programm entdeckten Karzinome im Vergleich zur Stadienverteilung innerhalb derselben Altersgruppe vor Start des Screening-Programms. **Abb. 2** zeigt die Karzinome ohne Lymphknotenbefall in der Zielbevölkerung und bei den Screening-Teilnehmerinnen.

### Schonendere Behandlung

Kombiniert man die günstigere Stadienverteilung der Karzinome bei Screening-Teilnehmerinnen mit dem heutigen leitliniengerechten Vorgehen, ist offensichtlich, dass Vorteile von Frühentdeckung keineswegs nur die Frauen betreffen, deren Leben gerettet werden können. Naturgemäß sind bei Entdeckung kleinerer Karzinome bessere kosmetische Ergebnisse zu erwarten, eine höhere Rate an brusterhaltender Therapie (BET), weniger Axilladissectionen und weniger Chemotherapien.

Auch hierzu berichten Screening-Gegner von fehlenden Vorteilen oder sogar von Nachteilen (z. B. höhere Mastektomieeraten) [8, 16].

Die berichteten Nachteile beziehen sich im einen Fall auf sehr alte Daten (vor systematischer Einführung der BET) [8], im anderen Fall [16] dürften sich diese Berechnungen ergeben haben aus einem gegenläufigen Effekt durch gleichzeitige Einführung des Screenings und einen parallel dazu laufenden Wandel der therapeutischen Standards (modernere Therapien kamen v. a. den verspätet entdeckten Karzinomen der Kontrollgruppe zugute).

Entgegen den Berechnungen von Screening-Gegnern konnten zuständige Institute verschiedener Länder für Screening-Teilnehmerinnen folgende (aus der geänderten Stadienverteilung zu erwartenden) Vorteile nachweisen:

- ▶ eine Abnahme an Mastektomien zugunsten einer höheren Rate an BET
- ▶ eine höhere Rate an Sentinel-Lymphknoten-Operationen bei Abnahme der Axilladissectionen [17–19]

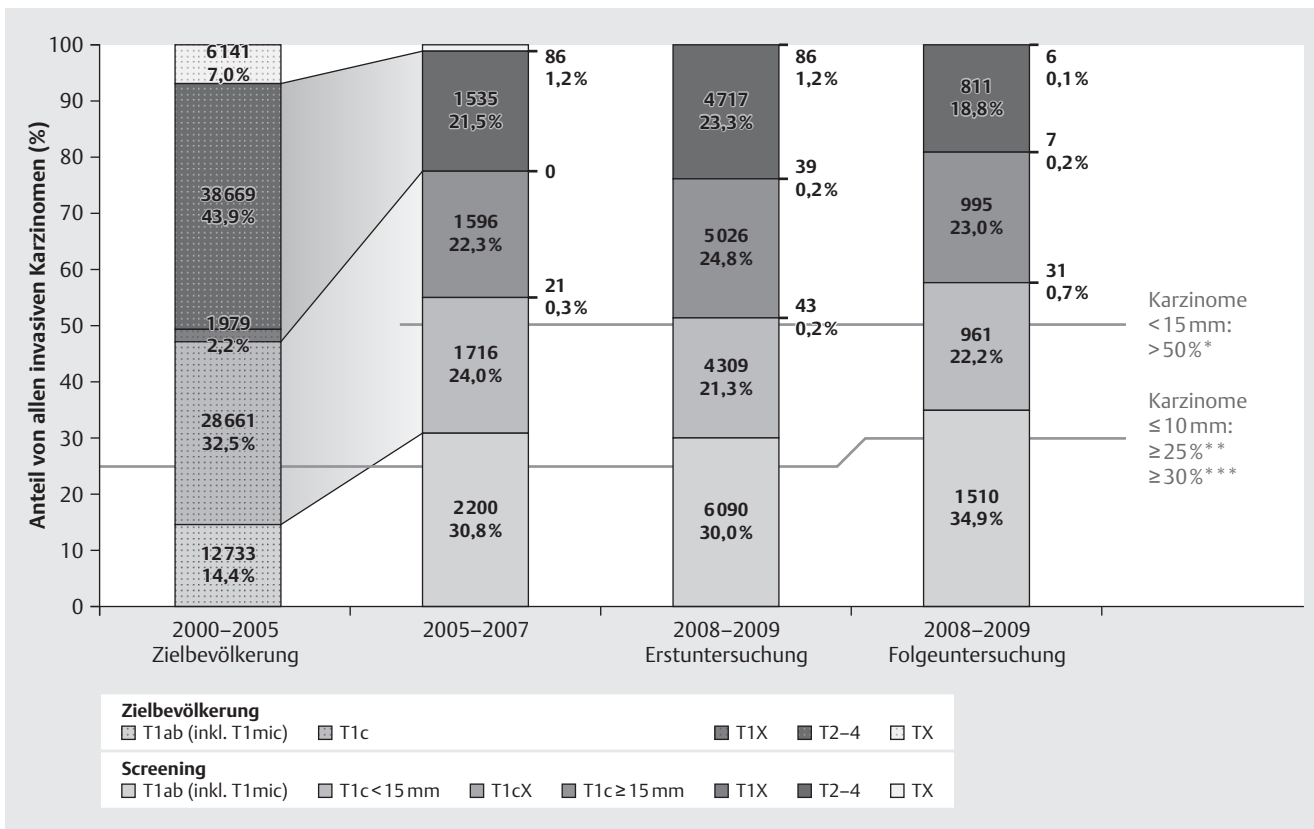

**Abb. 1** Einfache T-Stadienverteilung von invasiven Mammakarzinomen im Screening (2005–2007, 2008–2009) und in der Zielbevölkerung (2000–2005). In der gescreenten Bevölkerung fällt eine Zunahme der kleinen invasiven Karzinome auf [24].

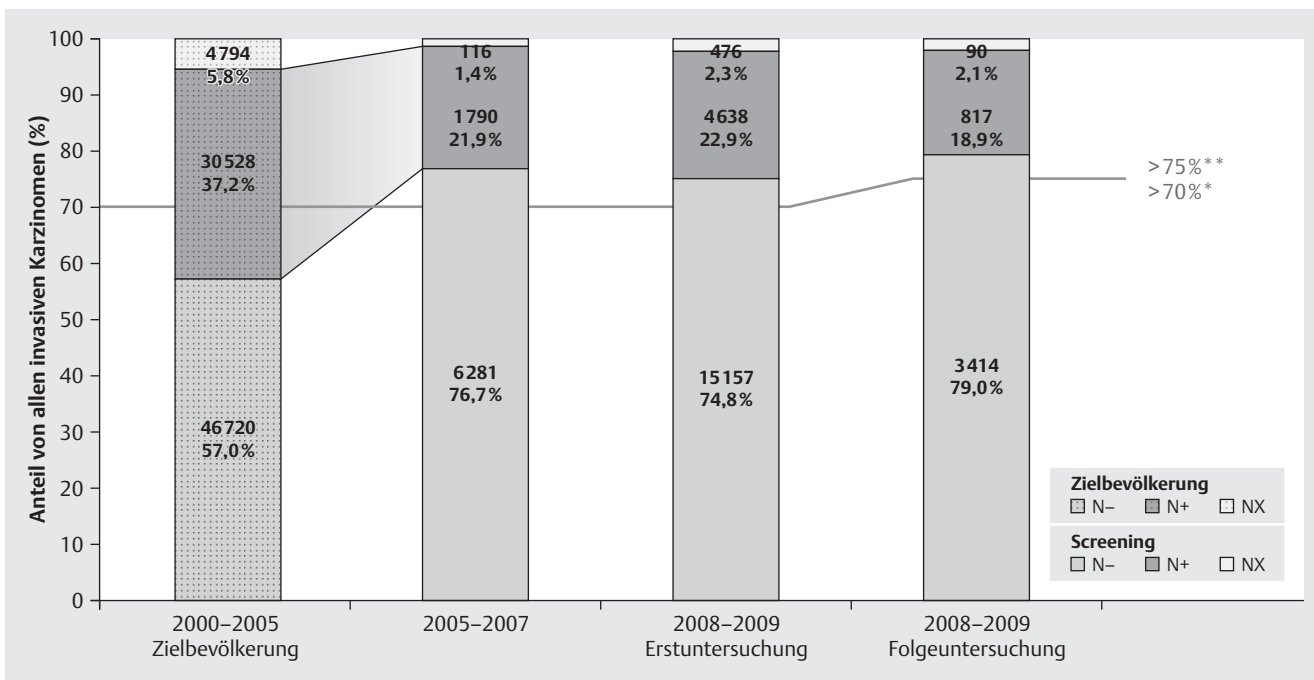

**Abb. 2** Anteil Lymphknoten-negativer Karzinome im Screening (2005–2007, 2008–2009) und in der Zielbevölkerung (2000–2005). Der Effekt des Screenings zeigt sich bereits zu Beginn des Programms: eine Zunahme nodal-negativer Karzinome bei gleichzeitiger Abnahme nodal-positiver Karzinome bei den gescreenten Frauen [24].

Bei noch fehlendem Krebsregisterabgleich in Deutschland liegt jetzt erstmalig eine inzidenzbasierte Trendanalyse aus Bayern vor. Hierin werden Behandlungstrends von 2000 bis 2008 für verschiedene Altersgruppen verglichen. Diese zeigen für die Altersgruppe der 50- bis 69-Jährigen (bei Screening-Teilnahme, die in diesem Zeitraum von 0 auf ca. 30% zunahm) im Vergleich zu den anderen Altersgruppen folgende erste Trends: stärker abnehmende Mastektomieeraten, stärkere Abnahme der adjuvanten Chemotherapien, stärkere Abnahme an Axilladissektionen [20].

### Strahlendosis

Da Strahlung Krebs auslösen kann, ist gerade beim Screening, bei dem überwiegend gesunde Frauen regelmäßig mit Röntgenstrahlung untersucht werden, eine Optimierung der Strahlendosis von besonderer Bedeutung. Dabei hängen aber Bildqualität und Dosis eng miteinander zusammen. Um optimale Bildqualität bei minimal nötiger Dosis zu erhalten und damit Früherkennung kleinster Veränderungen zu gewährleisten, sind abgesehen von moderner Gerätetechnik eine optimal abgestimmte Geräte- und Einstelltechnik, die kontinuierliche Schulung und Überprüfung der Befunder sowie die Optimierung der gesamten Screening-Kette ausschlaggebend. Die wichtigsten technischen Komponenten werden im Screening täglich online sowie jährlich vor Ort überwacht. Nach Krebsfrüherkennungsrichtlinie und Röntgenverordnung sind sog. IGel-Mammografien, bei denen die gesamte für Screening vorgesehene Qualitätssicherung umgangen werden kann, für die Früherkennung asymptomatischer Frauen nicht zulässig.

Bei der im Screening vorgesehenen Qualitätssicherung geht man inzwischen von einer mittleren Parenchymdosis von deutlich unter 4 mGy aus. (Die individuell notwendige Parenchymdosis variiert stark in Abhängigkeit von Brustgröße und Kompression.) Insgesamt liegt (entsprechend aktuellen Berechnungen) das Risiko, durch eine Mammografie Brustkrebs auszulösen, bereits ab dem 40. Lebensjahr ganz deutlich (Faktor 50–100) unter dem jährlichen natürlichen Risiko, an Brustkrebs zu erkranken [21, 22]. Geht man davon aus, dass durch qualitätsgesichertes Mammografie-Screening die Mortalität gesenkt werden kann, was naturgemäß auch in dem seltenen Fall einer Karzinomauslösung durch Mammografie zutrifft, so liegt der errechnete Nutzen deutlich über dem Risiko. Dieses ist ein Grund dafür, dass in den westlichen Ländern Mammografie-Screening zugelassen und empfohlen ist. Entsprechend S3-Leitlinie [23] kann die bei einer Screening-Mammografie applizierte Strahlendosis nicht als Argument gegen eine Screening-Mammografie angesehen werden.

### Falsch-positiv-Rate

Das deutsche Mammografie-Screening-Programm erfolgt nach EU-Leitlinie als reines Mammografie-Screening. Wird im Rahmen der unabhängigen Doppelbefundung und nachfolgenden Konsensuskonferenz eine Auffälligkeit festgestellt, lädt der programmverantwortliche Arzt (PVA) die Frau zur weiteren Abklärung (sog. bildgebendes Assessment) ein. Bei der Mehrzahl der bildgebenden Abklärungen kann bereits beim ersten Abklärungstermin Malignität ausgeschlossen werden. Ist dieses nicht möglich, folgt die histologische Abklärung, die von hoch erfahrenen Untersuchern so schonend wie möglich in über 90% der Fälle mit minimalinvasiven Methoden durchgeführt wird. In der Bewertung des Programms zählt dabei bereits jede Einladung zur Abklärung als positiver Befund und wird als „falsch positiv“ bezeichnet, falls der Befund sich schlussendlich als gutartig herausstellt. Die in Deutschland durchgeführten Abklärungen werden

bereits prospektiv erfasst und sind damit eindeutig [24]. Für die Jahre 2008–2009 (Tab. 1 und 2) wurden bei Erstuntersuchungen 6,1% der Frauen zur Abklärung eingeladen, was bei 8,2 entdeckten Karzinomen von 1000 gescreenten Frauen einer „Falsch-positiv-Rate“ von 5,3% entspricht. Bei Folgeuntersuchungen (Frauen, die wiederholt am Screening teilnehmen) wurden durchschnittlich 3% der Frauen zur Abklärung eingeladen bei 5,6/1000 entdeckten Karzinomen, entsprechend einer „Falsch-positiv-Rate“ von 2,44%.

Histologische Abklärungen (i. d. R. minimalinvasive Untersuchungen) wurden 2008–2009 im Screening bei 1,5% aller Frauen (Erst- und Folgeuntersuchungen)<sup>1</sup> durchgeführt, wobei sich bei 7,6/1000 Frauen<sup>1</sup> ein Malignom ergab. Dieses entspricht einer Rate von 0,74% falsch positiven Biopsieempfehlungen.

Screening-Gegner berechnen aus weitaus höheren US-amerikanischen Abklärungsraten dann die Zahl der „falsch positiven Befunde“ über 20 Jahre Screening und sprechen von sog. „Falsch-positiv-Raten“ des Screenings von bis zu 50%. Dieses ist für das deutsche Programm nicht zutreffend.

Im Mammografie-Screening liegt die Falsch-positiv-Rate (bezogen auf die Empfehlung zu einer weiteren Abklärung) mit 5,3% in der ersten und 2,44% in den Folgerunden, insbesondere aber die Rate an falsch positiven Biopsieempfehlungen weitaus niedriger als bei anderen bildgebenden Methoden [25].

Berechnet man nun Falsch-positiv-Raten bezogen auf das 20-jährige „Screening-Leben“ einer Frau im deutschen Mammografie-Screening, so ergibt sich anhand der prospektiv erhobenen Ergebnisse von 2008–2009 [24], dass < 300 von 1000 Frauen durchschnittlich 1-mal innerhalb von 20 Jahren wegen eines schlussendlich gutartigen Befunds zur ergänzenden Bildgebung eingeladen würden. Davon ist durchschnittlich bei 74 Frauen ein histologisches Assessment zur Sicherung des gutartigen Befunds erforderlich. Gleichzeitig werden in diesem Zeitraum 76 Mammarkarzinome im Screening gefunden.

Im Vergleich mit den gepoolten Ergebnissen aus anderen Screening-Ländern [26] liegt die Einbestellungsrate zu bildgebenden Untersuchungen in Deutschland durchschnittlich etwas höher bei vergleichbarer Rate an histologischen Klärungen. Besonders positiv hervorzuheben ist der deutlich geringere Anteil offener Biopsien, der sich auf die konsequente Einführung moderner minimalinvasiver Techniken im deutschen Programm erklärt.

### Intervallkarzinome

Intervallkarzinome sind definiert als Karzinome, die innerhalb von 24 Monaten nach einer unauffälligen Screening-Mammografie (also im Screening-Intervall) auftreten. Sie sind nicht mit übersehenen Befunden gleichzusetzen, da diese nur einen Teil der Intervallkarzinome (s. u.) ausmachen [29]. Sie weisen aber die Grenzen eines Screening-Programms auf.

Mammarkarzinome können jederzeit (und nicht nur alle 2 Jahre) entstehen, die Screening-Maßnahme erfolgt lediglich punktuell (alle 2 Jahre). Es gibt keine Methode (weder die Mammografie noch andere bildgebende Verfahren) mit einer 100%igen Vorhersagewahrscheinlichkeit für 2 Jahre, wodurch Intervallkarzinome weltweit und bei allen Screening-Methoden unvermeidbar sind. Intervallkarzinome im Mammografie-Screening setzen sich wie folgt zusammen:

<sup>1</sup> Daten aus dem deutschen Mammografie-Screening-Programm.

1. Karzinome, die im Intervall neu entstehen und somit zum Zeitpunkt des Screenings nicht existent waren („no sign“).
2. Karzinome, die zum Zeitpunkt des Screenings existieren, aber mit der Methode Mammografie (auch retrospektiv) nicht erkennbar sind („no sign“).
3. Karzinome, die prospektiv nicht erkennbar bzw. ausreichend sicher von gutartigen Veränderungen unterscheidbar sind, wo aber aufgrund einer unspezifischen mammografischen Veränderung retrospektiv auf die Existenz bzw. Entwicklung an entsprechender Lokalisation geschlossen werden kann („minimal sign“).
4. Karzinome, die (auch von 2 erfahrenen Befundern bei der unabhängigen Befundung) übersehen oder fehleingeschätzt wurden („missed“ oder „misinterpreted“).

Eine Unterscheidung zwischen den o.g. Gruppen ist keineswegs trivial, da es naturgemäß fließende Übergänge gibt. Da die Mammografie aufgrund der zahllosen Normvarianten, verschiedener gutartiger Veränderungen (wie auch andere mammadiagnostische Methoden) schwierig zu interpretieren ist, kann sich – je nach Vorinformation (Kenntnis von Lokalisation und Erscheinungsbild des später diagnostizierten Karzinoms vs. geblindete Befundung gemischt mit unauffälligen Fällen) [26] z.T. eine sehr unterschiedliche Einschätzung ergeben. Bei fehlender Blindung und retrospektiver Beurteilung wird die prospektive Diagnostizierbarkeit eines Befunds insbesondere von wenig erfahrenen Gutachtern z.T. deutlich überschätzt, wenn ihnen die Lokalisation eines Befunds bekannt ist.

Für Patientinnen und fachfremde Untersucher ist zudem bisweilen schwer zu verstehen, dass trotz der allgemein guten Sensitivität der Mammografie für kleine Karzinome bisweilen auch größere Karzinome mammografisch nicht diagnostizierbar sind. Dieses erklärt sich daraus, dass, je nach Drüsenkörper und Karzinomtyp, Karzinome, die keinen Mikrokalk enthalten, durch dichteres Drüsengewebe oder gutartige Veränderungen verdeckt sein können oder diese Veränderungen imitieren können. Insbesondere diffus wachsende Karzinome und Karzinome, die sich in (häufig als Normalbefunden vorkommenden) vorbestehenden Asymmetrien entwickeln, können hierzu gehören.

Insgesamt geht man anhand der Ergebnisse aus europäischen Screening-Programmen davon aus, dass ca. 25% aller Karzinome, die unter Screening-Teilnehmerinnen innerhalb von 2 Jahren vorkommen bzw. entstehen, im Intervall diagnostiziert werden [1,27]. Tatsächlich übersehene Karzinome dürften bei unabhängiger Doppelbefundung hierbei nur einen kleinen Teil aller Intervallkarzinome (unter 5–10%) ausmachen.

Für das deutsche Mammografie-Screening-Programm liegen bislang – bedingt durch die immer noch in Klärung befindlichen datenschutzrechtlichen Regelungen – keine exakten Zahlen vor.

Ein erster vollständig anonymisierter Krebsregisterabgleich für die Jahre 2005–2007 (erste Screening-Runde) aus NRW [28] wies einen Anteil von 22% Intervallkarzinomen auf. Dieses entspricht einer Sensitivität der Mammografie bezogen auf das gesamte (!) 2-Jahres-Intervall von 78% für die Erstrunde. Für die Frau mit einem unauffälligen Screening-Befund liegt die Wahrscheinlichkeit, dass auch in den folgenden 2 Jahren *kein* Brustkrebs im Intervall auffällt > 98,8% (negativer Vorhersagewert).

Anders ausgedrückt könnte man auch sagen, dass man bei 1,5–2 von 1000 Frauen mit unauffälligem Mammografie-Screening-Befund (Erstrunde) mit einem Intervallkarzinom rechnen muss.

Aufgrund der datenschutzrechtlich derzeit geforderten Anonymisierung waren Einzelfallanalysen weiterhin nicht möglich. Wegen der in den Folgerunden naturgemäß geringeren Brust-

krebsentdeckungsrate ist für zukünftige Berechnungen noch mit einer etwas geringeren Gesamtsensitivität zu rechnen. Aus etablierten europäischen Screening-Programmen werden Programmsensitivitäten zwischen 67 und 84% berichtet [27].

Diese Ergebnisse sprechen, wie auch (s.o.) die anderen Surrogatparameter, im internationalen Vergleich für eine gute Qualität des deutschen Mammografie-Screening-Programms. Dieses Ergebnis beinhaltet bei fehlendem Einzelfallabgleich und noch bestehenden Lücken im Krebsregister auch noch (jeweils gegenläufige) Fehlermöglichkeiten.

### Überdiagnosen

Überdiagnose ist definiert als die Diagnose eines Brustkrebses, der ohne Screening zu Lebzeiten der Frau nicht entdeckt worden wäre. Überdiagnosen sind damit unerwünschte Screening-Ergebnisse. Im biologischen Sinne ist ein zusätzlich diagnostizierter Brustkrebs in der Screening-Gruppe ebenso ein realer Brustkrebs wie jede außerhalb des Screening-Programms entdeckte Brustkrebserkrankung, dessen frühzeitige Erkennung Leben retten kann.

Überdiagnosen entstehen dadurch, dass Brustkrebs in der gescreenten Gruppe z.T. deutlich früher als in der ungescreenten Gruppe erkannt wird (sog. Lead-Time-Bias). Diese vorgezogene Diagnose wird dann zur Überdiagnose, wenn sich der Brustkrebs wie bspw. bei einem niedrig malignen DCIS so langsam entwickelt, dass die Betroffene stirbt, bevor die Brustkrebserkrankung (ohne Screening) symptomatisch geworden wäre.

Da im Einzelfall weder die verbleibende Lebenszeit einer Frau noch der genaue Krankheitsverlauf ohne Entdeckung vorhersehbar sind, können Überdiagnosen niemals sicher einer einzelnen Frau zugeordnet werden.

Die Berechnung von Überdiagnosen und ihre Unterscheidung von vorgezogenen Diagnosen ist äußerst schwierig und unterliegt – da hierfür immer Annahmen nötig sind – erheblichen Unsicherheiten. Es sind für solche Berechnungen immer Annahmen notwendig. Je nach Berechnungsmethode ergeben sich extreme Schwankungen in der Berechnung der zu erwartenden Überdiagnosen. Publiziert wurden Schätzungen zwischen 0 und 50% aller im Screening diagnostizierten Brustkrebserkrankungen [30–34]. Fehlermöglichkeiten dürften bei allen Abschätzungsverfahren liegen [11,30,35].

Berechnungen von extrem hohen Überdiagnosen [31,32] erklären sich größtenteils methodisch, z. B. durch unzureichende Nachbeobachtungszeit, unzureichende Berücksichtigung des Length-Time-Bias im statistischen Vorgehen, Wahl ungeeigneter Kontrollgruppen, fehlende Berücksichtigung externer Trends). Die EUROSCREEN-Gruppe analysierte die Literatur zu diesem Thema unter besonderer Berücksichtigung korrekter Methodik und schätzt die Rate an Überdiagnosen auf 1–10%, durchschnittlich 6% [30].

Zuverlässige Schätzungen zur Häufigkeit von Überdiagnosen dürften zwischen 5 und 20% aller Krebsdiagnosen liegen [2,30,33,34]. Insgesamt ist zu betonen, dass aufgrund des hohen Einflusses der Berechnungsmethodik und der kontroversen und diskrepanten Ergebnisse in der Literatur die bestehende Evidenz bez. der Berechnung von Überdiagnosen als sehr gering einzustufen ist. Die wissenschaftliche Datenlage zu diesem Thema ist also eindeutig und steht im Widerspruch zu der Ansicht der Screening-Gegner.

**Tab. 3** Überblick bez. der im Screening zu erwartenden Zahlenwerte (Absolutwerte für 20 Jahre Screening bei 1 000 Teilnehmerinnen). Die Werte entstammen der Übersichtarbeit der EUROSCREEN Working Group [3] und beziehen die im deutschen Screening-Programm ermittelten Werte bez. Abklärungen ein. In der Kontrollgruppe versterben ohne Screening 19 Frauen<sup>2</sup>, in der gescreenten Gruppe versterben 11 (10–12) Frauen<sup>2</sup>. Dieses entspricht 8 geretteten Leben bei 1 000 Screening-Teilnehmerinnen oder einer Mortalitätsreduktion von ca. 43%.

|                                                                     | mit Screening (TN)   | ohne Screening (N-TN) | Differenz |
|---------------------------------------------------------------------|----------------------|-----------------------|-----------|
| Anzahl Frauen                                                       | 1 000                | 1 000                 |           |
| Mammografien/20 Jahren                                              | 10 000               | unbekannt             |           |
| Einbestellungen für jegliche Abklärung wegen benigner Veränderungen | 288 (inkl. Biopsien) | unbekannt             |           |
| davon:                                                              |                      |                       |           |
| ▶ Biopsie wegen benigner Veränderung                                | 74                   | unbekannt             |           |
| ▶ entdeckte Karzinome (Screening-Zeitraum und Follow-up)            | 71                   | 67                    | 4 (- 14)  |
| ▶ Todesfälle durch Karzinome (betr. Screening-Zeitraum)             | 11                   | 19                    | 7 bis 9   |

### Überblick und absolute Zahlen

Prozentangaben werden sowohl von Screening-Gegnern wie von Screening-Befürwortern eingesetzt. Sie können je nach Bezugsbasis erheblich variieren und bei wechselnder Bezugsbasis zu relativen Verzerrungen führen und ein falsches Bild ergeben.

Im Folgenden wird ein Überblick gegeben über die zu erwartenden absoluten Häufigkeiten positiver bzw. negativer Wirkungen des Screenings (☉ Tab. 3). Wichtig ist es, zu verstehen, dass Brustkrebs zwar jede 9. Frau in ihrem Leben treffen kann (Lebenszeitrisiko ca. 11%), das jährliche Risiko (jährlich wiederkehrend!) aber mit 3/1000 gering ist. Hieraus ergibt sich die Notwendigkeit für regelmäßige Untersuchungen vieler asymptomatischer Frauen, wenn man Brustkrebs früh- und rechtzeitig erkennen möchte.

Verglichen werden im Folgenden 1000 Frauen, die über 20 Jahre am Screening teilnehmen (TN), mit 1000 Frauen, die nicht teilnehmen (N-TN).

Die Teilnehmerinnen unterziehen sich alle 2 Jahre einer Mammografie (= 10 000 Screening-Mammografien in 20 Jahren zwischen 50–69).

Wegen eines gutartigen Befunds<sup>1</sup> werden durchschnittlich 288 Frauen 1-mal in 20 Jahren (pro Runde 28,8/1000 oder knapp 3%) zur Abklärung eingeladen, wovon sich 74 (7,4 pro Runde<sup>2</sup>) einmal in 20 Jahren wegen eines gutartigen Befundes einer histologischen Klärung unterziehen müssen.

Entsprechend den Berechnungen der EUROSCREEN-Gruppe werden bei TN durchschnittlich 71 Mammakarzinome (ca. 56 im Screening und 15 im Intervall), in der Kontrollgruppe (N-TN) (unter Berücksichtigung einer adäquaten Nachbeobachtungszeit) sind es durchschnittlich 67 Mammakarzinome. Die Differenz von 4 Karzinomen entspricht damit den Überdiagnosen. (Das sind tatsächliche Mammakarzinome, die ohne Screening zu Lebzeiten der Frau nicht aufgefallen wären. Entsprechend Berechnungen der UK-Panels könnten es bis zu 14 sein<sup>3</sup>.)

Ein relevanter Anteil der 56 Frauen mit im Screening entdecktem Brustkrebs dürfte von einer früheren Entdeckung profitieren (mehr Brusterhaltung, weniger Axilladissektionen, weniger Chemotherapien durch Entdeckung in früherem Stadium). Modellberechnungen hierzu liegen nicht vor.

<sup>2</sup> Die Zahlen des deutschen Screenings dürften derzeit deshalb noch zu hoch berechnet sein, da sich diese Zahl von 2008–2009 im Wesentlichen aus den häufigeren histologischen Abklärungen der ersten Runde zusammensetzt.

<sup>3</sup> Die Berechnungen ergeben sich 2 randomisierten Studien mit 6 Jahren Nachbeobachtungszeit. Eine fälschliche Erhöhung dieser Berechnung kann sich dabei auch ergeben, wenn ehemalige Screening-Teilnehmerinnen sich weiter grauem Screening unterzogen haben.

In der Kontrollgruppe versterben ohne Screening 19 Frauen<sup>2</sup>, in der gescreenten Gruppe versterben 11 (10–12) Frauen<sup>2</sup>. Dieses entspricht 8 geretteten Leben bei 1000 Screening-Teilnehmerinnen oder einer Mortalitätsreduktion von ca. 43%.

### Diskussion

Seit seiner Einführung zwischen 2005 und 2009 hat sich das Mammografie-Screening in Deutschland zunehmend etabliert. Die Outcome-Parameter des deutschen Mammografie-Screening-Programms erfüllen die Vorgaben der EU-Leitlinien und zeigen auch im internationalen Vergleich sehr gute Ergebnisse (☉ Tab. 1 und 2).

Eine tendenziell leicht höhere Abklärungsrate mittels bildgebender Untersuchungen im Vergleich zu anderen Screening-Ländern ist, in Anbetracht der (trotz parallel existierendem opportunistischem grauem Screening) erstaunlich hohen Rate an entdeckten Karzinomen, nicht nur vertretbar, sondern liegt auch im Rahmen der von den EU-Leitlinien vorgegebenen Grenzwerte. Die für das deutsche Programm errechnete Biopsierate erscheint, bezogen auf das Gesamtprogramm, hoch, ist aber verzerrt durch die hohe Zahl an Erstuntersuchungen, bei denen höhere Biopsieraten angesetzt werden müssen. Hervorzuheben ist der erfreulich hohe Anteil minimalinvasiver Biopsien unter den histologischen Abklärungen im deutschen Programm. Er dürfte auf die frühe Einbeziehung der Vakuumbiopsie zurückzuführen sein, bei der sich Deutschland wie auch in der Einführung des digitalen Screenings als Vorreiter in Europa erwies. Daten zur Mortalitätsreduktion oder zu Überdiagnosen sind nach der erst 2009 erreichten Flächendeckung derzeit noch nicht zu erwarten. Nach jetzigem Wissen ist (basierend auf Stadienverteilung und Detektionsraten) zu erwarten, dass das deutsche Programm damit vergleichbare Effekte wie andere qualitätsgesicherte Screening-Programme in Europa erreichen kann.

Generell sind von Screening-Programmen (wie auch bei anderen medizinischen Maßnahmen) sowohl positive Wirkungen als auch mögliche Nebenwirkungen zu erwarten.

Nach zahllosen Angriffen gegen das Mammografie-Screening-Programm wurde inzwischen durch ein unabhängiges britisches Panel bestätigt, dass die anhand der randomisierten Studien errechnete und der WHO angegebene Mortalitätsreduktion (ca. 30% für die tatsächliche Teilnehmerin) weiterhin Gültigkeit besitzt. Die EUROSCREEN Working Group konnte für aktuelle qualitätsgesicherte Screening-Programme anhand der Daten aus 18 Ländern eine Mortalitätsreduktion von ca. 43% errechnen (☉ Tab. 3). Alle bislang verfügbaren Daten sprechen auch für Deutschland für eine gute Effektivität des Programms.



Eine Mortalitätsreduktion um 43% entspricht ca. 8 geretteten Leben pro 1000 Screening-Teilnehmerinnen. (Dabei ist zu berücksichtigen, dass innerhalb der 20 Screening-Jahre zwischen 50–69 lediglich 70 Mammakarzinome bei 1000 Teilnehmerinnen auftreten, von denen ca. 19 ohne Screening tödlich verlaufen.)

Angaben von Screening-Gegnern, die einen „Benefit“ bei „nur 1/1000“ Frauen oder ähnlich geringe Effektivität behaupten, entsprechen nicht der aus allen Metaanalysen und randomisierten Studien resultierenden Datenlage [2], beziehen sich auf andere Zeiträume oder eine andere Altersgruppe (z. B. 10 Jahre Screening bei unter 40-Jährigen etc.). Zudem werden Vorteile durch die frühere Behandlung ignoriert.

Die als erster Nachteil oft benannte Strahlendosis sollte bei korrekter Anwendung wegen des sehr geringen Risikos bei deutlichem Benefit auch weiterhin kein Grund gegen Screening sein [21–23]. Vor sog. IGeL-Mammografien (mit z. T. zweifelhafter Bewertung, z. B. durch Niedrigdosis-Mammografie oder „Wohlfühlfaktor“) ist wegen fehlender Qualitätssicherung und damit auch unsicherem Effekt zu warnen.

Wenn Brustkrebs frühzeitig entdeckt werden soll, sind weitere Klärungen bei einer gewissen Zahl schlussendlich gutartiger Veränderungen (wie bei fast jedem medizinischen Test) unvermeidbar. Im Screening sind hierfür Einbestellungen erforderlich. Erfreulicherweise zeigt qualitätsgesichertes Mammografie-Screening eine sehr hohe Spezifität, sodass pro Runde nur ca. 30/1000 Frauen wieder einbestellt werden müssen. Bezogen auf den Screening-Zeitraum bedeutet das, dass knapp 300 Frauen *1-malig* (also bei 10 Screening-Runden) innerhalb von 20 Jahren wegen eines schlussendlich gutartigen Befunds einbestellt werden. Die qualitätsgesicherte Abklärung im Mammografie-Screening erfolgt dabei so schonend wie möglich (meist ohne Biopsie, ansonsten i. d. R. mit minimalinvasiven Biopsieverfahren). Ungefähr jede zweite Nadelbiopsie ergibt ein Malignom. Stellt man diese Nachteile dem Vorteil der Lebensrettung sowie der schonenderen Behandlung bei früherer Diagnose gegenüber, ist die Belastung durch Abklärung medizinisch gering und gut vertretbar. Zur Überbrückung einer möglichen kurzfristigen, sehr unterschiedlichen psychischen Belastung der Patientin zwischen Einladung und Klärung ist eine enge Zusammenarbeit der Screening-Einheit mit den betreuenden Frauen- und Hausärzten unbedingt anzustreben.

Tatsächlich gibt es kein anderes diagnostisches Verfahren mit derart hoher Spezifität wie das Mammografie-Screening-Programm. Vergleicht man Ultraschall und MRT beim Einsatz für Brustkrebsfrüherkennung mit der Mammografie, so ist zunächst zu bemerken, dass prospektive Studien bei asymptomatischen Frauen ohne erhöhtes Risiko fehlen. Bei Risikokollektiven zeigt sich, dass je nach Risikokonstellation durch ergänzende Methoden die Sensitivität angehoben werden kann. Die Spezifität fällt aber durch die Hinzunahme weiterer Methoden deutlich ab. Bei alleiniger Mammografie sind insbesondere deutlich weniger invasive Abklärungen (> Faktor 3) erforderlich [25, 38]. Empfehlungen zu kurzfristigen Kontrollen (sofern in Publikationen angegeben) liegen bei sonografischen und MRT-Untersuchungen z. T. um mehr als den Faktor 10 höher als mit Mammografie [38, 39]. Ein weiterer unerwünschter Effekt jeder Screening-Untersuchung, die bei Anwendung von sensitiven Testverfahren relevant wird (also Verfahren, die Krebs deutlich früher erkennen können, als er tastbar ist), ist die sog. Überdiagnose. Überdiagnosen sind daher bei jeglicher Früherkennung (inklusive grauem Screening) zu erwarten, aber wegen fehlender Daten prinzipiell dort nicht bestimmbar. Sie kommen vor, wenn Brustkrebs mit

Bildgebung (oder einem anderen Test) sehr früh entdeckt wird und/oder sehr langsam wächst, sodass die Frau ohne Screening zu Lebzeiten nicht von ihm erfahren hätte. Eine zu hohe Zahl an Überdiagnosen ist zu vermeiden, da sie zur Mortalitätsreduktion nicht beiträgt, die Patientin aber durch die Kenntnis von ihrem Brustkrebs und die Behandlung unnötig belastet wird. Leider sind alle Abschätzungen aufgrund der unsicheren Datenlage mit erheblichen kalkulatorischen Schwankungsbreiten behaftet. Die derzeitige Diskussion um Überdiagnosen [31], die sogar z. T. unkorrekt als fälschlich diagnostizierter Brustkrebs dargestellt werden, ist in Anbetracht des bestehenden sehr niedrigen Evidenzlevels wissenschaftlich unverstehend und medizinisch im Sinne der Patientin kaum zu vertreten.

In Anbetracht der Vorteile erscheint die nach vertrauenswürdigen Berechnungen ermittelte Zahl an Überdiagnosen durchaus medizinisch zu rechtfertigen. Wichtig ist es zu verstehen, dass bei keiner einzelnen Frau vorhersehbar ist, ob die besonders frühe Diagnose eines Brustkrebses ihr zugute kommt (durch Lebensrettung und bessere Therapiemöglichkeiten) oder einer Überdiagnose entsprechen könnte. Daher bleiben Entdeckung und angemessene Behandlung sinnvoll und wichtig. Tatsächlich hängt der „Schaden“ einer Überdiagnose eng mit der ihr folgenden Therapie zusammen. Gerade bei frühen Brustkrebserkrankungen sind üblicherweise Chemotherapien oder Axilladissektionen selten. Mit zunehmend früherer Entdeckung kommt allerdings einer optimalen Anpassung der Therapie an das individuelle Risiko der Patientin besonders hohe Bedeutung zu.

Trotz der hohen Sensitivität der Mammografie sind Intervallkarzinome nicht vermeidbar. Durch angemessene Aufklärung ist sicherzustellen, dass klinische Befunde auch nach einer unauffälligen Screening-Mammografie einer weiteren Abklärung zugeführt werden.

Wenngleich bekannt ist, dass mit Sonografie oder MRT ergänzende Brustkrebsfälle gefunden werden können, ist ein reines Sonografie- oder MRT-basiertes Screening derzeit aufgrund der weit aus schlechteren Spezifität und der für Screening bislang unzureichenden Qualitätssicherung nicht möglich.

Erste ermutigende Ergebnisse wurden vom prospektiven Einsatz der Tomosynthese berichtet, einer mammografischen Methode, bei der Schichtbilder der Brust berechnet werden [36, 37].

Unabhängig von den durch Screening-Kritiker (hierbei handelt es sich eigentlich um Gegner jeglicher Früherkennung) verursachten Diskussionen erweist sich das qualitätsgesicherte Mammografie-Screening als sinnvolle und wichtige Maßnahme. Eventuelle Nebenwirkungen und Grenzen sind zu berücksichtigen und zu minimieren. Explizit ist darauf hinzuweisen, dass evtl. Nebenwirkungen von Screening mindestens gleichermaßen auf graues Screening zutreffen, dort aber Wirkungen und Nebenwirkungen ebenso wie die für Früherkennung angemessene Qualität nicht überprüfbar sind. Wenngleich die Akzeptanz des Screenings bei Screening-Teilnehmerinnen hoch ist [24], sollte die bundesweite Teilnehmerate von zuletzt publizierten 54% im Sinne der Frauen weiter gesteigert werden. Hier können gerade die Frauenärzte wichtige Aufklärungsarbeit leisten.

Zukünftige Forschung sollte sich konzentrieren auf mögliche und sinnvolle Ergänzungen insbesondere zur Reduktion von Intervallkarzinomen und späten Stadien. Für besonders früh entdeckte kleine Mammakarzinome ist die optimale Anpassung der Therapie wichtig. Hier sollte eine Reduzierung belastender Therapien mit geeigneten Studien erwogen werden.

## Interessenkonflikt

Alle Autoren sind im deutschen Mammographie-Screening Programm tätig.

## Institute

- <sup>1</sup> Referenzzentrum Mammografie München, München
- <sup>2</sup> Referenzzentrum Südwest, Marburg
- <sup>3</sup> Referenzzentrum Münster, Münster
- <sup>4</sup> Referenzzentrum Nord, Oldenburg
- <sup>5</sup> Referenzzentrum Berlin, Berlin
- <sup>6</sup> Referenzzentrum München, München
- <sup>7</sup> Kooperationsgemeinschaft Mammografie, Berlin

## Literatur

- 1 Perry N, Broeders M, De Wolf C et al., eds. European Guidelines for Quality Assurance in Mammography Screening. 4th ed. Luxembourg: Office for Official Publications of the European Communities; 2006
- 2 Independent UK Panel on Breast Cancer Screening. The benefits and harms of breast cancer screening: an independent review. *Lancet* 2012; 380: 1778–1786
- 3 EUROSCREEN Working Group. Summary of the evidence of breast cancer service screening outcomes in Europe and first estimate of the benefit and harm balance sheet. *J Med Screen* 2012; 19 (Suppl. 1): 5–13
- 4 Gøtzsche PC, Olsen O. Is screening for breast cancer with mammography justifiable? *Lancet* 2000; 355: 129–134
- 5 Baines CJ, Miller AB, Kopans DB et al. Canadian National Breast Screening Study: assessment of technical quality by external review. *Am J Roentgenol* 1990; 155: 743–747
- 6 Tarone RE. The excess of patients with advanced breast cancers in young women screened with mammography in the Canadian National Breast Screening Study. *Cancer* 1995; 75: 997–1003
- 7 Kopans DB. Why the critics of screening mammography are wrong. *Diagnostic Imaging* 2009; 31: 1–5
- 8 Gøtzsche PC, Nielsen M. Screening for breast cancer with mammography. *Cochrane Database Syst Rev* 2009; 4: CD001877
- 9 International Agency for Research on Cancer (WHO). Press release no. 139 19-03-02. Mammography screening can reduce deaths from breast cancer. 2002. [www.iarc.fr/en/media-centre/pr/2002/pr139.html](http://www.iarc.fr/en/media-centre/pr/2002/pr139.html); Stand: 15.10.2013
- 10 Brenner H, Heywang-Köbrunner S, Becker N. Re: [answer to Gigerenzer G, Mata J, Frank R] Public knowledge of benefits of breast and prostate cancer screening in Europe. *J Natl Cancer Inst* 2010; 102: 356
- 11 Hackshaw A. The benefits and harms of mammographic screening for breast cancer: building the evidence base using service screening programmes. *J Med Screen* 2012; 19 (Suppl. 1): 1–2
- 12 Broeders M, Moss S, Nyström N et al.; EUROSCREEN Working Group. The impact of mammographic screening on breast cancer mortality in Europe: a review of observational studies. *J Med Screen* 2012; 19 (Suppl. 1): 14–25
- 13 Broeders M, Moss S, Nyström L et al.; EUROSCREEN Working Group. The impact of mammographic screening on breast cancer mortality in Europe: a review of trend studies. *J Med Screen* 2012; 19 (Suppl. 1): 26–32
- 14 Jørgensen KJ, Zahl PH, Gøtzsche PC. Breast cancer mortality in organised mammography screening in Denmark: comparative study. *BMJ* 2010; DOI: 10.1136/bmj.c1241
- 15 Kalager M, Zelen M, Langmark F et al. Effect of screening mammography on breast cancer mortality in Norway. *NEJM* 2010; 363: 1203–1210
- 16 Suhrke P, Mæhlen J, Schlichting E et al. Effect of mammography screening on surgical treatment for breast cancer in Norway: comparative analysis of cancer registry data. *BMJ* 2011; 343: d4692
- 17 Samnakay N, Tinning J, Ives A et al. Rates for mastectomy are lower in women attending a breast-screening programme. *ANZ J Surg* 2005; 75: 936–939
- 18 Zorzi M, Puliti D, Vettorazzi M et al. Mastectomy rates are decreasing in the era of service screening: a population-based study in Italy (1997–2001). *Br J Cancer* 2006; 95: 1265–1268
- 19 Dillon MF, Hill AD, Quinn CM et al. Surgical intervention in screen-detected patients versus symptomatic patients with breast cancer. *J Med Screen* 2004; 11: 130–134; Erratum in: *J Med Screen* 2004; 11: 211
- 20 Schrodi S, Braisch U, Schenkirsch G et al. Veränderungen der Therapie des Mammakarzinoms in Bayern seit Einführung des Mammographie-Screenings. Eine Analyse bayerischer Krebsregisterdaten der Jahre 2000 bis 2008. *Gesundheitswesen* 2013; [Epub ahead of print]
- 21 Yaffe MJ, Mainprize JG. Risk of radiation-induced breast cancer from mammographic screening. *Radiology* 2011; 258: 98–105
- 22 Hendrick RE. Radiation doses and cancer risks from breast imaging studies. *Radiology* 2010; 257: 246–253
- 23 Albert U. Stufe-3-Leitlinie Brustkrebs-Früherkennung in Deutschland. München, Wien, New York: W. Zuckschwerdt Verlag; 2008
- 24 Kooperationsgemeinschaft Mammographie. Evaluationsbericht 2008–2009. Ergebnisse des Mammographie-Screening-Programms in Deutschland. [http://www.mammo-programm.de/cms\\_upload/datenpool/qualibericht\\_2012\\_final\\_web.pdf](http://www.mammo-programm.de/cms_upload/datenpool/qualibericht_2012_final_web.pdf); Stand: 15.10.2013
- 25 Heywang-Köbrunner S, Schreer I, Heindel W et al. Bildgebung für die Brustkrebsfrüherkennung. *Dtsch Arztebl* 2008; 105: 541–547
- 26 Hofvind S, Skaane P, Vitak B et al. Influence of review design on percentages of missed interval breast cancers: retrospective study of interval cancers in a population-based screening program. *Radiology* 2005; 237: 437–443
- 27 Törnberg S, Kemtli L, Ascunce N et al. A pooled analysis of interval cancer rates in six European countries. *Eur J Cancer Prev* 2010; 19: 87–93
- 28 Heidinger O, Batzler WU, Krieg V et al. Häufigkeit von Intervallkarzinomen im deutschen Mammographie-Screening-Programm: Auswertungen des Epidemiologischen Krebsregisters Nordrhein-Westfalen. *Dtsch Arztebl Int* 2012; 109: 781–787
- 29 Bock K, Hecht G, Heindel W et al. Krebsregisterdaten – Bedeutung von Intervallkarzinomen im Mammografie-Screening-Programm. *Senologie* 2013; 10: 12–14
- 30 Puliti D, Duffy SW, Miccinesi G et al.; EUROSCREEN Working Group. Overdiagnosis in mammographic screening for breast cancer in Europe: a literature review. *J Med Screen* 2012; 19 (Suppl. 1): 42–56
- 31 Jørgensen KJ, Gøtzsche PC. Overdiagnosis in publicly organised mammography screening programmes: systematic review of incidence trends. *BMJ* 2009; 339: b2587
- 32 Zahl PH, Gøtzsche PC, Mæhlen J. Natural history of breast cancers detected in the Swedish mammography screening programme: a cohort study. *Lancet Oncol* 2011; 12: 1118–1124
- 33 Njor SH, Olsen AH, Blichert-Toft M et al. Overdiagnosis in screening mammography in Denmark: population based cohort study. *BMJ* 2013; 346: f1064
- 34 Falk RS, Hofvind S, Skaane P et al. Overdiagnosis among women attending a population-based mammography screening program. *Int J Cancer* 2013; 133: 705–712
- 35 Duffy SW, Lyne E, Jonsson H et al. Complexities in the estimation of overdiagnosis in breast cancer screening. *Br J Cancer* 2008; 99: 1176–1178
- 36 Skaane P, Bandos AI, Gullien R et al. Prospective trial comparing full-field digital mammography (FFDM) versus combined FFDM and tomosynthesis in a population-based screening programme using independent double reading with arbitration. *Eur Radiol* 2013; 23: 2061–2071
- 37 Ciatto S, Houssami N, Bernardi D et al. Integration of 3D digital mammography with tomosynthesis for population breast-cancer screening (STORM): a prospective comparison study. *Lancet Oncol* 2013; 14: 583–589
- 38 Berg WA, Blume JD, Cormack JB et al. Combined screening with ultrasound and mammography vs. mammography alone in women at elevated risk of breast cancer. *ACRIN 6666 Investigators. JAMA* 2008; 299: 2151–2163; Erratum in: *JAMA* 2010; 303: 1482
- 39 Kuhl CK, Schrading S, Weigel S et al. The “EVA” trial: evaluation of the efficacy of diagnostic methods (mammography, ultrasound, MRI) in the secondary and tertiary prevention of familial breast cancer. Preliminary results after the first half of the study period. *Rofo* 2005; 177: 818–827
